## Disparities in Continuous Glucose Monitor Use Between Children With Type 1 Diabetes Living in Urban and Rural Areas

Daniel R. Tilden, Benjamin French, Karishma A. Datye, and Sarah S. Jaser

*Diabetes Care* 2024;47(3):346–352 | <https://doi.org/10.2337/dc23-1564>

### Disparities in Continuous Glucose Monitor Use Between Children with Type 1 Diabetes Living in Urban and Rural Areas

Nearly 20% of the U.S. population lives in a rural community, where the incidence of T1D is significantly higher.

| RESEARCH DESIGN                                                                                                                                                                                                                                                                                                                                                                                                                         | RESULTS                                                                                                                                                                                                                                                                                                                                                                                                                                                                                                                                                                                             | CONCLUSIONS                                                                                                                                                                                                                                                                                                                                                                                                                                                                                      |
|-----------------------------------------------------------------------------------------------------------------------------------------------------------------------------------------------------------------------------------------------------------------------------------------------------------------------------------------------------------------------------------------------------------------------------------------|-----------------------------------------------------------------------------------------------------------------------------------------------------------------------------------------------------------------------------------------------------------------------------------------------------------------------------------------------------------------------------------------------------------------------------------------------------------------------------------------------------------------------------------------------------------------------------------------------------|--------------------------------------------------------------------------------------------------------------------------------------------------------------------------------------------------------------------------------------------------------------------------------------------------------------------------------------------------------------------------------------------------------------------------------------------------------------------------------------------------|
| <p><b>AIM:</b> To explore the impact of rural location in use of CGM technology to guide parent and provider decision-making.</p> <p><b>DESIGN + METHODS:</b> Retrospective review of EHR demographic and visit data from 1/1/2018 - 12/31/2021, comparing the odds of visits including CGM interpretation between urban and rural designations.</p>  | <p><b>2,008 children (&lt;18 yo) with T1D completed 13,645 visits.</b></p> <p>Of those,</p> <ul style="list-style-type: none"> <li>Children living in rural towns had 31% lower odds of completing a CGM-billed clinic visit compared to those living in urban areas.</li> <li>Children living in isolated rural towns had 49% lower odds.</li> </ul> <p>Additionally, those living in areas of social deprivation or who are from marginalized racial and ethnic groups also had lower rates of CGM visits.</p>  | <p>These findings strongly suggest, in addition to socioeconomic status and racial and ethnic background, <b>geographic place is a risk factor for encountering barriers to diabetes care and use of diabetes technology</b> in children living with T1D.</p> <p>Future work should explore barriers rural families face in effective CGM use to inform future interventions and best clinical practice.</p>  |

CGM, continuous glucose monitoring; EHR, electronic health record; T1D, type 1 diabetes.

### ARTICLE HIGHLIGHTS

- Why did we undertake this study?**  
 Evidence suggests that rural geography is a barrier to accessing health care among adults with diabetes, but little is known about care for children with type 1 diabetes.
- What is the specific question we wanted to answer?**  
 We wanted to assess differences in continuous glucose monitor use between children living in rural areas compared with their urban peers.
- What did we find?**  
 Children living in small and isolated rural towns had significantly lower odds of completing continuous glucose monitor-billed clinic visits compared with their urban peers.
- What are the implications of our findings?**  
 Rural geography is an underrecognized barrier to care among children with type 1 diabetes—future research should evaluate barriers to care faced by these patients and their families.

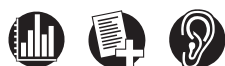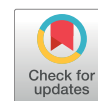

# Disparities in Continuous Glucose Monitor Use Between Children With Type 1 Diabetes Living in Urban and Rural Areas

Daniel R. Tilden,<sup>1</sup> Benjamin French,<sup>2</sup>  
Karishma A. Datye,<sup>3</sup> and Sarah S. Jaser<sup>4</sup>

*Diabetes Care* 2024;47:346–352 | <https://doi.org/10.2337/dc23-1564>

## OBJECTIVE

Despite evidence that continuous glucose monitoring (CGM) use is associated with lower HbA<sub>1c</sub> among children with type 1 diabetes, uptake of this technology remains lower among those with difficulty accessing health care, including those from lower socioeconomic status backgrounds and racial and ethnic minorities. In this study, we sought to explore the impact of rural location in use of CGM technology to guide patient and provider decision making.

## RESEARCH DESIGN AND METHODS

In this retrospective study of electronic health record demographic and visits data from a single diabetes program from 1 January 2018 through 31 December 2021, we compared the odds of completing a visit with (+) and without (–) CGM interpretation between rural-urban commuting area (RUCA) designations.

## RESULTS

Among the 13,645 visits completed by 2,008 patients with type 1 diabetes younger than age 18 years, we found children living in small rural towns had 31% lower odds (6.3% of CGM+ visits, 8.6% of CGM– visits; adjusted odds ratio [aOR] 0.69, 95% CI 0.51–0.94) and those living in isolated rural towns had 49% lower odds (2.0% of CGM+ visits, 3.4% of CGM– visits; aOR 0.51, 95% CI 0.28–0.92) of completing a CGM-billed clinic visit compared with those living in urban areas (70.0% of CGM+ visits, 67.2% of CGM– visits). We also found significant differences in CGM-billed visits by neighborhood deprivation as well as race/ethnicity and insurance payor.

## CONCLUSIONS

Geographic location presents a meaningful barrier to access to care for patients living with type 1 diabetes. Further work is needed to identify and address the needs of children and families living in rural areas to improve the care of these patients.

Continuous glucose monitor (CGM) use by children and adolescents with type 1 diabetes has been shown to improve glycemic outcomes in numerous, high-quality studies (1–3). CGMs decrease barriers to glucose monitoring by providing noninvasive, nearly real-time data to people with diabetes and their caregivers to inform daily insulin treatment decisions. In addition, online, cloud-based portals display long-term trends in blood glucose and provide important longitudinal data to providers, caregivers, and people with diabetes to guide adjustments in insulin regimens

<sup>1</sup>Division of Endocrinology, Diabetes & Clinical Genetics, Department of Medicine, University of Kansas Medical Center, Kansas City, KS

<sup>2</sup>Department of Biostatistics, Vanderbilt University Medical Center, Nashville, TN

<sup>3</sup>Ian M. Burr Division of Pediatric Endocrinology and Diabetes, Department of Pediatrics, Vanderbilt University Medical Center, Nashville, TN

<sup>4</sup>Division of Pediatric Psychology, Department of Pediatrics, Vanderbilt University Medical Center, Nashville, TN

Corresponding author: Daniel R. Tilden, [dtilden@kumc.edu](mailto:dtilden@kumc.edu)

Received 22 August 2023 and accepted 11 October 2023

This article contains supplementary material online at <https://doi.org/10.2337/figshare.24316954>.

This article is featured in podcasts available at [diabetesjournals.org/care/pages/diabetes\\_care\\_on\\_air](https://diabetesjournals.org/care/pages/diabetes_care_on_air).

© 2023 by the American Diabetes Association. Readers may use this article as long as the work is properly cited, the use is educational and not for profit, and the work is not altered. More information is available at <https://www.diabetesjournals.org/journals/pages/license>.

See accompanying article, p. 344.

and optimize glycemic outcomes. Despite these benefits in both short- and long-term outcomes associated with CGM use, previous studies have suggested substantial socioeconomic disparities in CGM prescriptions (4–6). Specifically, studies based on medical record review and CGM prescription data indicate that people with diabetes from lower socioeconomic status (SES), those who have public health insurance, and those from historically minoritized racial/ethnic groups lagged in important diabetes outcomes in general and use of CGM technology in particular (4,5,7–9).

While rural patients often face many of these same barriers to care access, such as limited access to broadband internet and difficulty with travel to urban or suburban medical clinics, disparities in CGM access by rurality remain underinvestigated (10–13). This is despite nearly 20% of the U.S. population living in rural areas, where the incidence of type 1 diabetes is significantly higher than in urban communities (14–16). Disparities in outcomes and increased care utilization among children with type 1 diabetes and other chronic diseases suggest that rural geography may contribute to adverse outcomes (17–26). Notably, results from the Type 1 Diabetes (T1D) Exchange—a national, clinic-based registry of people with type 1 diabetes—showed significantly higher average HbA<sub>1c</sub> among rural residents of all ages, with the largest disparities among children and young adults (25). These data highlight the need to better understand the causes of these disparities in order to address the needs of this population.

An important limitation of previous evaluations of CGM use among children and adolescents with type 1 diabetes was the reliance of these studies on prescription and medical record review to identify CGM use. Given substantial barriers to obtaining and using the devices, including cost, health system barriers, and diabetes-related stigma, there is likely a significant gap between being provided a CGM prescription and clinical CGM use. These barriers to use that occur after a prescription is written mean that a substantial number of people who receive a prescription for a CGM will not actually use the device. In this retrospective cohort study, we sought to better understand patterns of CGM use, defined by provider CGM billing codes, among a single-center cohort of pediatric patients with type 1 diabetes

living in rural areas compared with those living in urban settings. We hypothesized that pediatric patients with type 1 diabetes living in rural or socioeconomically deprived areas would have lower rates of clinic billing-defined CGM use compared with their urban and/or socioeconomically advantaged counterparts.

## RESEARCH DESIGN AND METHODS

We performed a retrospective cohort study of patients with type 1 diabetes identified in the Research Derivative, a database derived from Vanderbilt University Medical Center's clinical data systems and restructured for research. For this study, patients were included if they had a clinic visit in the Vanderbilt Pediatric Diabetes Program, which includes sites at an urban tertiary care hospital campus as well as four satellite clinics across middle and west Tennessee. Patients were included in the analysis if they completed at least one clinic visit with a pediatric endocrine provider each calendar year between 1 January 2018 and 31 December 2021. Patients were identified as having type 1 diabetes using the provider-assigned ICD-10, Clinical Modification diagnosis code (E10.\*), a highly specific predictor of diabetes diagnosis that has been used in previous, similar analyses (27,28). Patients were excluded if they died prior to study completion or if they had a co-occurring diagnosis of cystic fibrosis to exclude patients with cystic fibrosis-related diabetes. To exclude certified diabetes care and education specialist or registered dietitian visits, we required a documented point-of-care HbA<sub>1c</sub> result or a telemedicine specific billing code to be present on the day of a visit, both of which are done by protocol at every at medical doctor or nurse practitioner visit and with no other visit types. All eligible patients and patient visits were included in the final analysis. Visits at any of these care sites, as well as telemedicine visits conducted during the study period, were included in this analysis. Demographic data were extracted at the date of data extraction (30 April 2022) and used for analysis. This study was approved by the Vanderbilt University Institutional Review Board (IRB no. 201015). This manuscript follows the STrengthening the Reporting of OBservational studies in Epidemiology (STROBE) guidelines for cohort data reporting (29).

We assigned each patient a Rural-Urban Commuting Area (RUCA) 2010

code based on U.S. Census Tracts of their home address. Level 2 RUCA codes were then coded using the University of Washington's RUCA Categorization C (30,31). Similar methods were used to assign each patient a neighborhood deprivation index (NDI) value based on their home census tract (32). NDI is a composite score of 10 measures of socioeconomic status available as a part of the American Community Survey and developed to reflect U.S. Census Tract-level deprivation. NDI values range from −3.6 to 2.8, with higher values indicating higher deprivation (lower socioeconomic status). Visits were included for analysis among eligible patients if all demographic data were present, insurance information was available in the calendar year, and an HbA<sub>1c</sub> value was obtained within 3 months of the visit date.

The primary outcome was the presence or absence of the CGM interpretation Current Procedural Terminology (CPT) code (95251) with a completed pediatric endocrinology patient visit. Centers for Medicare & Medicaid Services guidelines require that providers review at least 72 h of CGM data in order to assign this code to a clinical visit. Starting in July 2017, division administrative policy was changed to require assignment of this CPT code for patient visits where CGM data were interpreted. For this study, data were included starting 1 January 2018 to minimize variation in CPT-based billing. During the study period, CGM prescribing was left to the discretion of the treating provider and available to all children treated in the practice.

During the 5-year study period, patients were seen at multiple clinic visits. Therefore, our analysis leveraged data from all patient visits and considered visits to be clustered within a patient. Descriptive statistics were used to compare characteristics between patient visits with and without the CGM billing code. Generalized estimating equations with a logit link for the binary outcome of completing a CGM-coded visit were used to estimate adjusted odds ratios (aORs) and 95% CIs across demographic characteristics. The models used a robust variance estimator to account for within-person correlation and were weighted by the total number of visits to account for potentially informative imbalances in the number of visits across patients (33). Covariates were selected based on previous evaluations in nonrural populations, which have shown several demographic factors, including electronic

health record-documented sex, race, and insurance type, are associated with significant differences in CGM use (6). Given increasing CGM adoption across the study period and strong evidence of decreasing HbA<sub>1c</sub> with sensor use, we also adjusted for these factors in our final model (1). Analyses were completed using Stata 17.0 software (StataCorp, College Station, TX).

### Data and Resource Availability

The data sets generated during and/or analyzed in the current study are available from the corresponding author upon reasonable request.

## RESULTS

### Visit and Patient Demographics

Across this 52-month study, a total of 2,008 children with type 1 diabetes were seen across 13,645 patient visits, of which 5,485 visits (40.2%) had a billing code for CGM interpretation. Among these 2,008 patients, more than two-thirds (1,356; 67.5%) had at least one encounter where a CGM was interpreted. Overall patient and visit-level characteristics were similar (Table 1), reflecting relatively uniform visit frequencies across captured demographic categories. Approximately two-thirds (9,308; 68.2%) of patient visits were completed by patients living in RUCA-designated urban areas, while 2,907 visits (21.3%) were from those residing in large rural towns. Just over 10% of visits were completed by those living in small rural towns (1,046; 7.7%) or isolated small rural towns (384; 2.8%). Male patients made up a slight majority of visits (52.9%; 7,219), while White, non-Hispanic patient visits were more than three-quarters (10,751; 78.8%) of visits, reflecting the overall demographics of type 1 diabetes nationally (34). Our sample included ~10% of patient visits from Black, non-Hispanic patients (1,399; 10.3%), while Hispanic patients (408; 3.0%) as well as patients from other racial and ethnic backgrounds (1,087; 8.0%) made up a smaller percentage of visit totals. There were 4,098 visits (30.0%) completed by patients with Medicaid as the primary insurer. Year-to-year visit numbers were stable from 2018 to 2019 (3,737 vs. 3,861), with fewer visits meeting inclusion criteria in 2020 (2,614), corresponding with the onset of the coronavirus disease 2019 (COVID-19) pandemic. Visits numbers increased again in 2021 but did not return to prepandemic levels (3,433). Visits with CGM use rose as a proportion of all visits across

**Table 1—Demographic characteristics of patients and patient visits**

|                                         | All patient visits (N = 13,645) | All patients (N = 2,008) |
|-----------------------------------------|---------------------------------|--------------------------|
| No. with CGM billing code*              | 5,485 (40.2)                    | 1,356 (67.5)             |
| NDI, mean (SD)                          | −0.026 (0.904)                  | 0.023 (0.900)            |
| RUCA (geographic) designation           |                                 |                          |
| Urban                                   | 9,308 (68.2)                    | 1,337 (66.6)             |
| Large rural city/town                   | 2,907 (21.3)                    | 447 (22.3)               |
| Small rural town                        | 1,046 (7.7)                     | 168 (8.4)                |
| Isolated small rural town               | 384 (2.8)                       | 56 (2.8)                 |
| Sex                                     |                                 |                          |
| Female                                  | 6,426 (47.1)                    | 940 (46.8)               |
| Male                                    | 7,219 (52.9)                    | 1,068 (53.2)             |
| Race/ethnicity                          |                                 |                          |
| White, non-Hispanic                     | 10,751 (78.8)                   | 1,505 (75.0)             |
| Black, non-Hispanic                     | 1,399 (10.3)                    | 198 (9.9)                |
| Hispanic                                | 408 (3.0)                       | 63 (3.1)                 |
| Other                                   | 1,087 (8.0)                     | 242 (12.1)               |
| Age (years), mean (SD)                  | 16.0 (4.3)                      | 15.6 (4.7)               |
| Visit insurance type                    |                                 |                          |
| Commercial                              | 9,547 (70.0)                    | 1,370 (68.2)             |
| Medicaid                                | 4,098 (30.0)                    | 638 (31.8)               |
| Year†                                   |                                 |                          |
| 2018                                    | 3,737 (27.4)                    | 1,220 (60.8)             |
| 2019                                    | 3,861 (28.3)                    | 1,298 (64.6)             |
| 2020                                    | 2,614 (19.2)                    | 1,182 (59.0)             |
| 2021                                    | 3,433 (25.2)                    | 1,342 (66.8)             |
| HbA <sub>1c</sub> (%), mean (SD)        | 8.8 (2.0)                       | 8.8 (1.8)                |
| HbA <sub>1c</sub> (mmol/mol), mean (SD) | 73 (22)                         | 73 (20)                  |

Data are presented as *n* (%), unless indicated otherwise. \*Shown is the number of visits with a CGM billing code or the number of patients with at least one visit with a CGM billing code. †Shown is the number of visits that year or the number of patients with a visit in the listed study year.

the 4 years with complete data (19.9% of visits in 2018 vs. 57.2% in 2021) (Fig. 1), although the absolute number of CGM-billed visits fluctuated due to decreased overall visits in 2020 during the COVID-19 pandemic.

### Visit-Level Associations of Rurality With CGM Use

We first compared crude rates of CGM visits by RUCA code (Fig. 1). Despite an increasing proportion CGM-billed visits from each RUCA designation, in each complete year of data from 2018 to 2021, we observed a lower proportion of CGM-billed visits being completed by those in the two most rural RUCA designations (small rural and isolated rural towns). On average, from 2018 to 2020, people with type 1 diabetes from small rural towns completed eight fewer CGM-billed visits per 100 visits compared with those from larger rural towns. In 2020, likely due to the effects of the COVID-19 pandemic, this difference

grew to >13 CGM-billed visits per 100 total visits. Rates of CGM-billed visits from the most rural RUCA designation significantly lagged those in the largest two RUCA designations from 2018 to 2020, with ~13 fewer CGM-billed visits per 100 total visits coming from these most rural patients. While this gap narrowed in 2021 for both of the two most rural patient groups, these patients still completed these visits at a notably lower rate their more urban counterparts.

To assess these differences more carefully, we conducted our primary regression analysis. In our adjusted primary analysis, increasing rurality was associated with significantly lower odds of CGM use (Table 2). Specifically, the odds of a CGM-billed visit were 31% lower among those living in small rural towns (odds ratio [OR] 0.69, 95% CI 0.51–0.94) and 49% lower among those living in isolated small rural towns (OR 0.51, 95% CI 0.28–0.92) compared with those living in urban areas

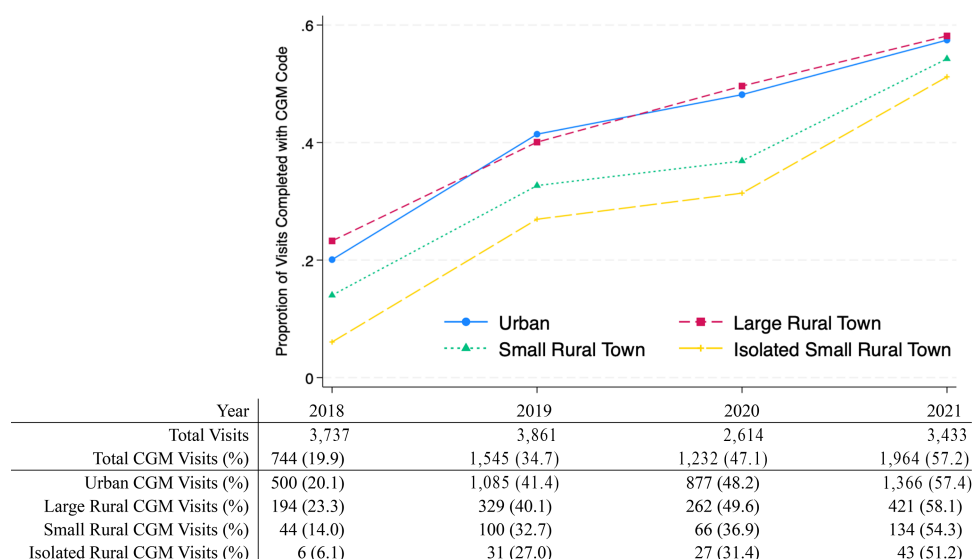

**Figure 1**—Proportion of visits with CGM billing by study year and rurality.

after adjusting for sex, race/ethnicity, HbA<sub>1c</sub>, visit year, and insurance type. Prior to adjustment, similar statistically significant trends and estimates of effect size were observed.

We also observed associations between visit-level CGM use with multiple covariates

of interest. In both adjusted and unadjusted models, those with public insurance had significantly lower odds of CGM use during clinic visits (unadjusted OR 0.44, 95% CI 0.38–0.52; aOR 0.58, 95% CI 0.48–0.69) compared with those with private insurance coverage. Similarly, people

with diabetes from historically marginalized racial and ethnic backgrounds had lower observed odds of CGM-billed visits compared with white patients, with non-Hispanic Black (OR 0.32, 95% CI 0.24–0.42) and Hispanic (OR 0.47, 95% CI 0.28–0.80) patients having significantly lower odds of

**Table 2**—Visit-level associations between CGM billing code and rurality of home address

|                                        | Visit type   |              | OR of CGM use for patient visits (95% CI) |         |                  |          |
|----------------------------------------|--------------|--------------|-------------------------------------------|---------|------------------|----------|
|                                        | CGM+         | CGM–         | Unadjusted                                | P value | Adjusted*        | P value† |
| <b>Rurality</b>                        |              |              |                                           |         |                  |          |
| Urban                                  | 3,828 (70.0) | 5,480 (67.2) | Reference                                 |         | Reference        |          |
| Large rural town                       | 1,206 (22.0) | 1,701 (21.0) | 1.05 (0.88–1.25)                          | 0.618   | 1.07 (0.90–1.29) | 0.444    |
| Small rural town                       | 344 (6.3)    | 702 (8.6)    | 0.73 (0.55–0.98)                          | 0.033   | 0.69 (0.51–0.94) | 0.018    |
| Isolated small rural town              | 107 (2.0)    | 277 (3.4)    | 0.57 (0.34–0.97)                          | 0.037   | 0.51 (0.28–0.92) | 0.025    |
| <b>Sex</b>                             |              |              |                                           |         |                  |          |
| Female                                 | 2,661 (48.5) | 3,765 (46.1) | Reference                                 |         | Reference        |          |
| Male                                   | 2,824 (51.5) | 4,395 (53.9) | 0.91 (0.79–1.06)                          | 0.234   | 0.87 (0.75–1.02) | 0.082    |
| <b>Race/ethnicity</b>                  |              |              |                                           |         |                  |          |
| White, non-Hispanic                    | 4,657 (84.9) | 6,094 (74.7) | Reference                                 | <0.001  | Reference        | <0.001   |
| Black, non-Hispanic                    | 271 (5.9)    | 1,128 (13.8) | 0.32 (0.24–0.42)                          |         | 0.48 (0.35–0.65) |          |
| Hispanic                               | 100 (1.8)    | 308 (3.8)    | 0.47 (0.28–0.80)                          |         | 0.54 (0.33–0.86) |          |
| Other                                  | 457 (8.3)    | 630 (7.7)    | 0.86 (0.65–1.13)                          |         | 0.64 (0.48–0.85) |          |
| <b>Age (years), mean (SD)</b>          | 15.0 (4.4)   | 16.7 (4.0)   | 0.92 (0.90–0.93)                          | <0.001  | 0.93 (0.92–0.95) | <0.001   |
| <b>Insurance type</b>                  |              |              |                                           |         |                  |          |
| Commercial                             | 4,404 (80.3) | 5,143 (63.0) | Reference                                 | <0.001  | Reference        | <0.001   |
| Medicaid                               | 1,081 (19.7) | 3,017 (37.0) | 0.44 (0.38–0.52)                          |         | 0.58 (0.48–0.69) |          |
| <b>Visit year</b>                      |              |              |                                           |         |                  |          |
| 2018                                   | 744 (13.3)   | 2,993 (36.7) | Reference                                 | <0.001  | Reference        | <0.001   |
| 2019                                   | 1,545 (27.8) | 2,316 (28.4) | 2.65 (2.37–2.96)                          |         | 2.79 (2.47–3.14) |          |
| 2020                                   | 1,232 (22.1) | 1,382 (16.9) | 3.51 (3.08–4.01)                          |         | 3.78 (3.29–4.36) |          |
| 2021                                   | 1,964 (35.2) | 1,469 (18.0) | 5.43 (4.75–6.61)                          |         | 6.04 (5.21–7.00) |          |
| <b>HbA<sub>1c</sub> (%), mean (SD)</b> | 8.0 (1.4)    | 9.3 (2.2)    | 0.68 (0.65–0.70)                          | <0.001  | 0.72 (0.69–0.74) | <0.001   |

Data are presented as *n* (%), unless indicated otherwise. \*Adjusted for sex, age, child race/ethnicity, HbA<sub>1c</sub>, private vs. public insurance, and visit year. †Grouped test evaluating equivalence in ORs over all groups except primary exposure.



CGM use in unadjusted analyses. These findings persisted in our adjusted analyses, with lower odds of CGM-billed visits among patients from non-White racial or ethnic backgrounds (non-Hispanic Black: OR 0.48, 95% CI 0.35–0.65; Hispanic: OR 0.54, 95% CI 0.33–0.86; other racial/ethnic backgrounds: OR 0.64, 95% CI 0.48–0.85). Consistent with data suggesting CGM use is associated with improvements in HbA<sub>1c</sub>, we also observed a significant association between odds of a CGM-billed visit and lower HbA<sub>1c</sub>, with unadjusted (OR 0.68, 95% CI 0.65–0.70) and adjusted analyses (OR 0.72, 95% CI 0.69–0.74) both demonstrating lower odds of CGM use during visits among those with higher HbA<sub>1c</sub> measurements at the time of their visit.

### Visit-Level Associations of NDI and CGM Use

Similar to our primary analysis, we first evaluated rates of CGM-billed visits across NDI by first stratifying by NDI quartiles (Supplementary Fig. 1). As in our primary analysis, we found overall consistent increases in CGM-billed visits as a proportion of total visits, but with persistently lower rates among those from areas of higher deprivation. Between 2018 and 2019, the top three NDI quartiles rose year over 1 year at similar rates, despite higher CGM-billed visit rates among those from less deprived areas (Q1: 26.2% to 48.9%; Q2: 22.6% to 44.3%; Q3: 14.3% to 34.3%), while the lowest quartile saw a more modest increase in CGM-visit rates (16.6% to 31.2%). However, despite continued steady increases in CGM-billed visits among those in the higher NDI quartile, those in the lowest three quartiles saw more modest increases in these visits both in 2020 and 2021. In order to further evaluate these differences, we conducted our secondary analysis of visit data (Table 3), which demonstrated a significant association between neighborhood deprivation and odds of a CGM-billed visit (unadjusted OR 0.75, 95% CI 0.69–0.81; aOR 0.84, 95% CI 0.77–0.92) with lower odds of CGM visits among patients living in neighborhoods with higher deprivation. As with the primary analysis, all covariates, with the exception of sex, demonstrated statistically significant associations with neighborhood deprivation, including race/ethnicity, age, insurance type, and HbA<sub>1c</sub>.

**Table 3—Visit-level associations between CGM billing code and NDI**

|                       | OR of CGM use for patient visits (95% CI) |          |
|-----------------------|-------------------------------------------|----------|
|                       | Adjusted model*                           | P value† |
| NDI                   | 0.84 (0.77–0.92)                          | <0.001   |
| Sex                   |                                           |          |
| Female                | Reference                                 |          |
| Male                  | 0.88 (0.75–1.03)                          | 0.104    |
| Race/ethnicity        |                                           |          |
| White, non-Hispanic   | Reference                                 | <0.001   |
| Black, non-Hispanic   | 0.52 (0.38–0.70)                          |          |
| Hispanic              | 0.58 (0.36–0.93)                          |          |
| Other                 | 0.67 (0.50–0.90)                          |          |
| Age (years)           | 0.93 (0.91–0.95)                          | <0.001   |
| Insurance type        |                                           |          |
| Commercial            | Reference                                 | <0.001   |
| Medicaid              | 0.62 (0.52–0.74)                          |          |
| Visit year            |                                           |          |
| 2018                  | Reference                                 | <0.001   |
| 2019                  | 2.76 (2.44–3.12)                          |          |
| 2020                  | 3.79 (3.28–4.38)                          |          |
| 2021                  | 6.05 (5.20–7.04)                          |          |
| HbA <sub>1c</sub> (%) | 0.72 (0.69–0.74)                          | <0.001   |

\*Adjusted for sex, age, child race/ethnicity, HbA<sub>1c</sub>, private vs. public insurance, and visit year. †Grouped test evaluating equivalence in ORs over all groups except primary exposure.

### CONCLUSIONS

Consistent with prior data in type 1 diabetes and other pediatric chronic disease populations (23,25), our findings suggest that pediatric patients with type 1 diabetes living in rural areas experience significant disparities in accessing diabetes care. After adjusting for sex, race/ethnicity, HbA<sub>1c</sub>, visit year, and insurance type, we found statistically significant and clinically meaningful lower odds of CGM-billed clinic visits among those living in small and isolated rural towns compared with those living in urban areas. Furthermore, we found that patients living in areas with more social deprivation, as measured by the NDI, also had significantly lower odds of completing visits with CGM data. Importantly, by using CGM billing codes as our outcome, our findings more closely reflect real-world device use and may account for known barriers to diabetes technology uptake in this population (25,35). Given accumulating evidence demonstrating significant improvements in glycemic outcomes among people with type 1 diabetes who use CGMs, these data underscore the importance of understanding geographic barriers to adoption of diabetes technology in order to improve outcomes for

people with type 1 diabetes (36). Notably, while not the primary objective of this study, we also found significantly lower rates of CGM-billed visits among those from historically marginalized racial and ethnic groups as well as those with Medicaid as their primary insurance coverage, findings which are consistent with previous literature (5,8,9).

Taken together, these findings strongly suggest that along with other factors, such as socioeconomic status and racial and ethnic background, geographic place is a risk factor for encountering barriers to use of diabetes technology and receiving optimal diabetes care. For example, previous work has identified lack of communication infrastructure, such as broadband internet, transportation to appointments, and local social and medical supports as potential barriers to accessing care among rural populations. Furthermore, the plateau in the overall rise in CGM adoption during the height of COVID-19–related lockdowns suggests that patients living in rural areas may be particularly vulnerable to health system disruptions. Given the unique challenges faced by patients living in rural areas and the understudied nature of this population, more data are needed to understand the specific barriers these patients face in engaging with care and how to best

address the needs of this population (37,38). In light of the findings of our previous work, which demonstrated wider disparities in care access among lower income and racial minorities during the early transition to telemedicine during COVID-19, these data suggest that health systems should proceed with caution in using technology-based solutions to address care gaps in care (27).

The current study has several advantages to previous work evaluating CGM-based outcomes. First, the diabetes program from which these data were drawn includes a clinical presence both in a large, urban academic medical center as well as in four clinical sites in larger rural towns. This expanded geographic presence resulted in a larger diversity of patient geography, improving the power of this study. In addition, our primary outcome—CGM-billing code—gives the current study several advantages. Previous work evaluating CGM use has relied on self-report, CGM prescription records, and/or review of provider clinic notes, none of which provide clarity on patient-level device use, how the data are driving care decisions, or for prescription data, whether the device is being used at all. Because providers are only able to bill with a CGM code if at least 72 h of CGM data have been reviewed during the clinic visit, using this as our outcome of interest ensures that those counted as “using” these devices have met these criteria. By using the billing code as our outcome, findings from the current study likely provide a more accurate reflection of patient-level barriers to CGM use, such as difficulty obtaining needed supplies and technological and connectivity challenges, which are key barriers especially relevant to rural populations.

Our study has several limitations. While basing our definition of CGM use on billing codes provides some advantages, we are not able to determine whether some visits may have included a CGM interpretation but were not appropriately coded. Given the large number of CGM prescriptions filled by durable medical equipment companies, we were not able to extract meaningful CGM prescription data from our electronic health record system to use this to help confirm our billing-based data. Despite this, given the financial incentives associated with these codes and administrative support for appropriate coding, the number of visits missing these codes is likely minimal and not correlated with patient geography, thus likely having

a minimal impact on these results. It is also possible that active CGM users experienced technical difficulties at the time of their visit that did not allow for billing in the office, despite active home CGM use. One of the significant benefits of CGMs are facilitating in-office adjustments of insulin regimens among patients with type 1 diabetes, which these patient visits would not have provided.

Additionally, our data set includes demographic data from the end of the study period and thus does not account for potential movement of patients between RUCA regions. However, with overall migration in the U.S. out of rural areas, assigning location based on a home address at the end of the study period would be expected to result in our estimated ORs being an underestimate of the true odds (39).

A final limitation is that this study spans the COVID-19 pandemic, including both pre- and postpandemic data, which significantly impacted diabetes care during this period. This significant heterogeneity in the nature of diabetes visits may have created some additional barriers to engaging with care, which we are not able to completely account for. Reassuringly, the results from this study are consistent with previous data from our research group evaluating technology use in diabetes care as well as previous data demonstrating disparities in technology use among young adults with type 1 diabetes (5,27,40).

In summary, these data from medical record reviews of a pediatric endocrinology program that includes a large catchment area show that children with type 1 diabetes living in rural areas are significantly less likely to complete diabetes care visits where CGM data are used as a part of patient care. These data suggest that pediatric diabetes providers should be aware of the potential barriers to CGM use experienced by patients living in rural areas and attempt to work together with patients to identify and develop strategies to overcome these barriers to optimal diabetes care. Future work should explore the barriers experienced by rural families in effectively using CGMs to understand these barriers and develop interventions to address disparities in technology use to improve outcomes among children with type 1 diabetes living in rural areas.

**Acknowledgments.** The authors thank Michelle Vitztum, MPH, for producing the visual abstract accompanying this article.

**Funding.** This publication was supported by National Institutes of Health, National Institute of Diabetes and Digestive and Kidney Diseases grants 3R01DK115545-05S1 (D.R.T.) and K12DK133995 (D.R.T.), the Vanderbilt Diabetes Research and Training Center National Institute of Diabetes and Digestive and Kidney Diseases grant P30DK20593 (D.R.T. and S.S.J.), and a National Center for Advancing Translational Sciences Clinical and Translational Science Awards award (UL1TR002243).

**Duality of Interest.** No potential conflicts of interest relevant to this article were reported.

**Author Contributions.** D.R.T. performed data extraction, cleaning, and initial statistical analysis, and drafted the manuscript. D.R.T. and B.F. completed the statistical analyses. D.R.T., K.A.D., and S.S.J. conceived the study design. All authors contributed to the discussion, edited the manuscript, and approved the final manuscript. D.R.T. is the guarantor of this work and, as such, had full access to all the data in the study and takes responsibility for the integrity of the data and the accuracy of the data analysis.

## References

1. Laffel LM, Kanapka LG, Beck RW, et al.; CGM Intervention in Teens and Young Adults with T1D (CITY) Study Group; CDE10. Effect of continuous glucose monitoring on glycemic control in adolescents and young adults with type 1 diabetes: a randomized clinical trial. *JAMA* 2020;323:2388–2396
2. Beck RW, Riddlesworth T, Ruedy K, et al.; DIAMOND Study Group. Effect of continuous glucose monitoring on glycemic control in adults with type 1 diabetes using insulin injections: the DIAMOND randomized clinical trial. *JAMA* 2017;317:371–378
3. Maiorino MI, Signoriello S, Maio A, et al. Effects of continuous glucose monitoring on metrics of glycemic control in diabetes: a systematic review with meta-analysis of randomized controlled trials. *Diabetes Care* 2020;43:1146–1156
4. Walker AF, Hood KK, Gurka MJ, et al. Barriers to technology use and endocrinology care for underserved communities with type 1 diabetes. *Diabetes Care* 2021;44:1480–1490
5. Agarwal S, Kanapka LG, Raymond JK, et al. Racial-ethnic inequity in young adults with type 1 diabetes. *J Clin Endocrinol Metab* 2020;105:e2960–e2969
6. Foster NC, Beck RW, Miller KM, et al. State of type 1 diabetes management and outcomes from the T1D Exchange in 2016–2018. *Diabetes Technol Ther* 2019;21:66–72
7. Chalew S, Gomez R, Vargas A, et al. Hemoglobin A1c, frequency of glucose testing and social disadvantage: metrics of racial health disparity in youth with type 1 diabetes. *J Diabetes Complications* 2018;32:1085–1090
8. Agarwal S, Hilliard M, Butler A. Disparities in care delivery and outcomes in young adults with diabetes. *Curr Diab Rep* 2018;18:65
9. Willi SM, Miller KM, DiMeglio LA, et al.; T1D Exchange Clinic Network. Racial-ethnic disparities in management and outcomes among children with type 1 diabetes. *Pediatrics* 2015;135:424–434
10. LePage AK, Wise JB, Bell JJ, Tumin D, Smith AW. Distance from the endocrinology clinic and

- diabetes control in a rural pediatric population. *J Pediatr Endocrinol Metab* 2020;34:187–193
11. Douthit N, Kiv S, Dwolatzky T, Biswas S. Exposing some important barriers to health care access in the rural USA. *Public Health* 2015;129:611–620
  12. Pew Research Center. Internet/Broadband Fact Sheet. 12 June 2019. Accessed 30 October 2022. Available from <https://www.pewresearch.org/internet/fact-sheet/internet-broadband/#who-has-home-broadband>
  13. Ekezie BF, Bushelle-Edghill J, Dong S, Taylor YJ. The effect of broadband access on electronic patient engagement activities: assessment of urban-rural differences. *J Rural Health* 2022;38:472–481
  14. Castillo-Reinado K, Maier W, Holle R, et al. Associations of area deprivation and urban/rural traits with the incidence of type 1 diabetes: analysis at the municipality level in North Rhine-Westphalia, Germany. *Diabet Med* 2020;37:2089–2097
  15. Coughlin SS, Clary C, Johnson JA, et al. Continuing challenges in rural health in the United States. *J Environ Health Sci* 2019;5:90–92
  16. Rogers MAM. Onset of type 1 diabetes mellitus in rural areas of the USA. *J Epidemiol Community Health* 2019;73:1136–1138
  17. Singh GK, Siahpush M. Widening rural-urban disparities in life expectancy, U.S., 1969–2009. *Am J Prev Med* 2014;46:e19–e29
  18. Bell CN, Owens-Young JL. Self-rated health and structural racism indicated by county-level racial inequalities in socioeconomic status: the role of urban-rural classification. *J Urban Health* 2020;97:52–61
  19. Cosby AG, McDoom-Echebiri MM, James W, Khandekar H, Brown W, Hanna HL. Growth and persistence of place-based mortality in the United States: the rural mortality penalty. *Am J Public Health* 2019;109:155–162
  20. Hale NL, Bennett KJ, Probst JC. Diabetes care and outcomes: disparities across rural America. *J Community Health* 2010;35:365–374
  21. Kurani SS, Lampman MA, Funni SA, et al. Association between area-level socioeconomic deprivation and diabetes care quality in US primary care practices. *JAMA Netw Open* 2021;4:e2138438
  22. Callaghan T, Ferdinand AO, Akinlotan MA, Towne SD Jr, Bolin J. The changing landscape of diabetes mortality in the United States across region and rurality, 1999–2016. *J Rural Health* 2020;36:410–415
  23. Peltz A, Wu CL, White ML, et al. Characteristics of rural children admitted to pediatric hospitals. *Pediatrics* 2016;137:e20153156
  24. Hudson SM, Magwood GS, Laken MA, Mueller M, Newman SD. A mixed methods analysis of the place-related risk and protective factors for hospital admissions and emergency department visits among children with complex chronic conditions. *Online J Rural Nurs Health Care* 2015;15. <https://rnoj.binghamton.edu/index.php/RNO/article/view/364>
  25. Gill A, Gothard MD, Briggs Early K. Glycemic outcomes among rural patients in the type 1 diabetes T1D Exchange registry, January 2016–March 2018: a cross-sectional cohort study. *BMJ Open Diabetes Res Care* 2022;10:e002564
  26. Cobry EC, Reznick-Lipina T, Pyle L, et al. Diabetes technology use in remote pediatric patients with type 1 diabetes using clinic-to-clinic telemedicine. *Diabetes Technol Ther* 2022;24:67–74
  27. Tilden DR, Datye KA, Moore DJ, French B, Jaser SS. The rapid transition to telemedicine and its effect on access to care for patients with type 1 diabetes during the COVID-19 pandemic. *Diabetes Care* 2021;44:1447–1450
  28. Crume TL, Hamman RF, Isom S, et al.; SEARCH for Diabetes in Youth Study Group. The accuracy of provider diagnosed diabetes type in youth compared to an etiologic criteria in the SEARCH for Diabetes in Youth Study. *Pediatr Diabetes* 2020;21:1403–1411
  29. von Elm E, Altman DG, Egger M, Pocock SJ, Gøtzsche PC; STROBE Initiative. The Strengthening the Reporting of Observational Studies in Epidemiology (STROBE) statement: guidelines for reporting observational studies. *Lancet* 2007;370:1453–1457
  30. Health Resources & Services Administration. Defining Rural Population. March 2022. Accessed 30 October 2022. Available from <https://www.hrsa.gov/rural-health/about-us/what-is-rural>
  31. University of Washington Rural Health Research Center. RUCA Data — Using RUCA Data. Accessed 6 June 2023. Available from <https://depts.washington.edu/uwrucaruca-uses.php>
  32. Diez Roux AV, Mair C. Neighborhoods and health. *Ann N Y Acad Sci* 2010;1186:125–145
  33. Williamson JM, Datta S, Satten GA. Marginal analyses of clustered data when cluster size is informative. *Biometrics* 2003;59:36–42
  34. Lawrence JM, Divers J, Isom S, et al.; SEARCH for Diabetes in Youth Study Group. Trends in prevalence of type 1 and type 2 diabetes in children and adolescents in the US, 2001–2017. *JAMA* 2021;326:717–727
  35. Kanbour S, Jones M, Abusamaan MS, et al. Racial disparities in access and use of diabetes technology among adult patients with type 1 diabetes in a U.S. academic medical center. *Diabetes Care* 2023;46:56–64
  36. Alonso GT, Triolo TM, Akturk HK, et al. Increased technology use associated with lower A1C in a large pediatric clinical population. *Diabetes Care* 2023;46:1218–1222
  37. Lewis LF, Brower PM, Narkewicz S. “We operate as an organ”: parent experiences of having a child with type 1 diabetes in a rural area. *Sci Diabetes Self Manag Care* 2023;49:35–45
  38. Jewell VD, Wise AC, Knezevich EL, Abbott AA, Feiten B, Dostal K. Type 1 diabetes management and health care experiences across rural Nebraska. *J Pediatr Health Care* 2023;37:48–55
  39. Jensen L, Monnat SM, Green JJ, Hunter LM, Sliwinski MJ. Rural population health and aging: toward a multilevel and multidimensional research agenda for the 2020s. *Am J Public Health* 2020;110:1328–1331
  40. Odugbesan O, Addala A, Nelson G, et al. Implicit racial-ethnic and insurance-mediated bias to recommending diabetes technology: insights from T1D Exchange multicenter pediatric and adult diabetes provider cohort. *Diabetes Technol Ther* 2022;24:619–627
